# Supplementary material for: Magnetically controlled release of recombinant tissue plasminogen activator from chitosan nanocomposites for targeted thrombolysis
Source: Royal Society of Chemistry journal article supplement (doi:10.1039/c5tb02579f), 2016-01-01
Supplement: c5tb02579f1.pdf [file c5tb02579f1.pdf]

## Electronic Supplementary Information (ESI)

### Magnetically Controlled Release of Recombinant Tissue Plasminogen Activator from Chitosan Nanocomposites for Targeted Thrombolysis

Jyh-Ping Chen, Jrh-Sin Leu, Hao-Lung Hsu, Tony Wu, Yu-Jen Lu and Yunn-Hwa Ma

#### Experimental Section

##### Preparation of $\text{Fe}_3\text{O}_4$ magnetic nanoparticle ( $\text{Fe}_3\text{O}_4$ MNP)

$\text{Fe}_3\text{O}_4$  MNP was obtained by reacting 4.75 g of  $\text{FeCl}_3 \cdot 6\text{H}_2\text{O}$  and 1.75 g of  $\text{FeCl}_2 \cdot 4\text{H}_2\text{O}$  in 80 ml of distilled deionized (DDI) water at 60 °C under  $\text{N}_2$  by stirring at 400 rpm for 1 hour. Eight milliliters of 28%  $\text{NH}_4\text{OH}$  was added to the solution, after which the color of the mixture turned from yellow to black immediately, and the solution was stirred at 600 rpm for another 20 minutes. The synthesized  $\text{Fe}_3\text{O}_4$  MNP was washed three times with DDI water by magnetic decantation, dialyzed (MWCO = 3500) against DDI water for 7 days with daily water change, and stored at 4 °C.

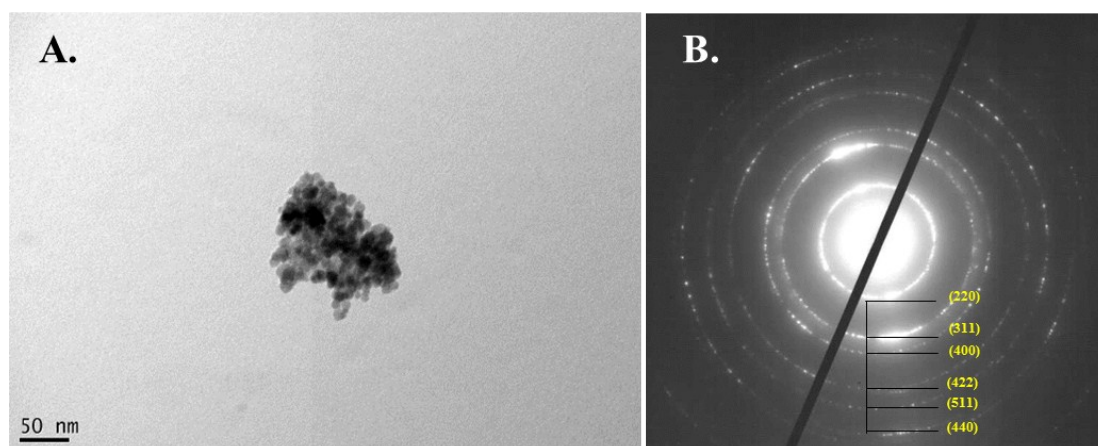

**Figure S1.** (A) Transmission electron microscope image (magnification = 500,000; bar = 50 nm) and (B) electron diffraction patterns of  $\text{Fe}_3\text{O}_4$  magnetic nanoparticle (MNP).
